# Supplementary material for: A secondary wave of neutrophil infiltration causes necrosis and ulceration in lesions of experimental American cutaneous leishmaniasis
Source: PubMed Central journal article supplement (PMC5462435; doi:10.1371/journal.pone.0179084), 2017-06-07

**A**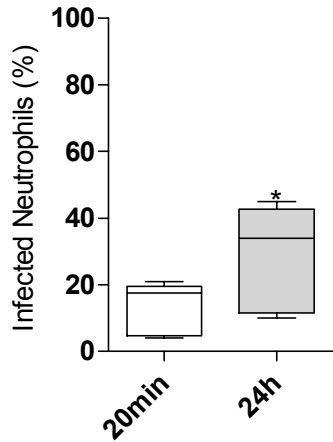**B**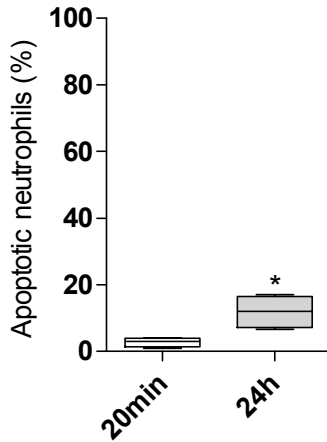**C**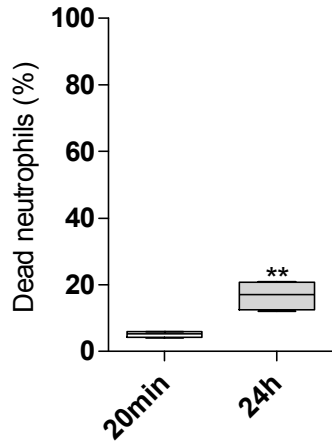

Supplement: pone.0179084.s003.pdf [file pone.0179084.s003.pdf]
