# Supplementary material for: A secondary wave of neutrophil infiltration causes necrosis and ulceration in lesions of experimental American cutaneous leishmaniasis
Source: PubMed Central journal article supplement (PMC5462435; doi:10.1371/journal.pone.0179084), 2017-06-07
Supplement: pone.0179084.s005.pdf [file pone.0179084.s005.pdf]

| Target gene                                      | Accession Number | Forward               | Reverse              |
|--------------------------------------------------|------------------|-----------------------|----------------------|
| Matrix metalloproteinase 9 (MMP-9, Gelatinase B) | XM_005084984     | ATGGTGCCCCATGTCACTTT  | AGTCTCTCACTGGGGCAGAA |
| Myeloperoxidase (MPO)                            | XM_013117645     | ACTGGACCCGTTGAGAGATG  | GATGCTTTCTCTCCGCTCCT |
| Collagenase-2 (MMP-8)                            | AF055671         | CCCAATGGAATCCTTGCCCA  | TGGGATACATCAAGGCACCG |
| Cathepsin G-like                                 | XM_005075353     | GCCATCCGCCATCCTGATTA  | GTTAGTGGCCTCAGGCAGTT |
| Proteinase-3 (PR-3)                              | XM_013122983     | CACCTTCCTATGTCTGGGAGC | AGAATGCCGTCGCAGATCAA |
| Neutrophil elastase-like                         | XM_013122977     | CCACTGTGTGAACGGCCTAA  | GGCTAAGCCATTGAGCTGGA |
| Colony stimulating factor 2 (Csf2), GM-CSF       | XM_005067904.1   | AAACCTGAACAACACCCCTGT | GGCCGTTCTCGTACACCTTC |
| Interleukin 1, beta (IL-1 $\beta$ )              | XM_005068610.2   | GTCATGAAAGGTGACACGCC  | CGCAGACTCAAACCTCACCT |

|                                                          |                |                        |                        |
|----------------------------------------------------------|----------------|------------------------|------------------------|
| Interleukin 6, (IL-6)                                    | AB028635.1     | ACCCTGGCTGTATGGACAATG  | AGTCCAGAAGACCAGAGGTGA  |
| C-X-C motif chemokine 2-like (CxCL2)                     | XM_005068086.2 | TTTCAAGACCATCCAGAGCTT  | GGGCTTCAGGATCGAGACAAA  |
| Tumor necrosis factor-alpha (TNF- $\alpha$ )             | AF046215.1     | AGGGAAGAGAAGTTCCCCAAC  | TCCACTTGGTGGTTTGCTACA  |
| Transforming growth factor-beta (TGF- $\beta$ )          | XM_013125593.1 | AACGACATTCGGGAAGCAGT   | ACGCCAGGTATTGTTGCTGT   |
| colony stimulating factor 3 (granulocyte) (Csf3) (G-CSF) | XM_005076035.1 | AGCTTCCTGCTGAAGTCCTTGG | GCACAGCTTGTAGGTAGCACAC |
| Interleukin 18 (IL-18)                                   | XM_013112955.1 | GGCTGCCACCTTCTACAAC    | GGGCCTTCTTCATGTTTGGC   |
